# Supplementary material for: Fabrication and delivery properties of soy Kunitz trypsin inhibitor nanoparticles
Source: Royal Society of Chemistry journal article supplement (doi:10.1039/c6ra19886d), 2016-01-01
Supplement: c6ra19886d1.pdf [file c6ra19886d1.pdf]

## Support Information

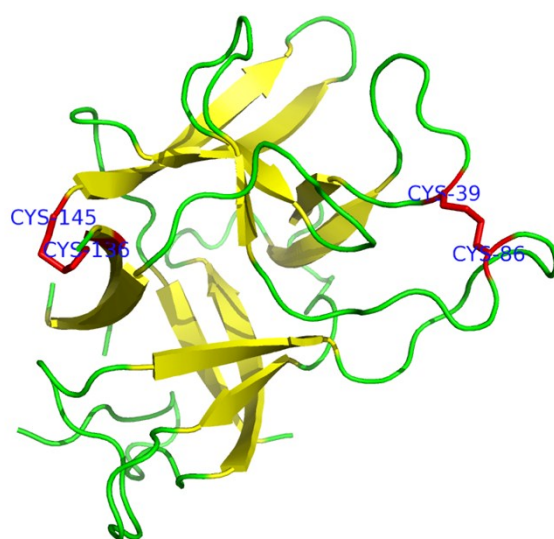

**Figure S1.** Pymol representation of the structure of soybean KTI. The 2.5 Å X-ray structure (PDB ID: 1BA7) was used to generate this diagram. Two disulfide bonds, involving Cys 39-Cys 86 and Cys 136-Cys 145, are shown in a red stick representation, which are solvent-exposed.

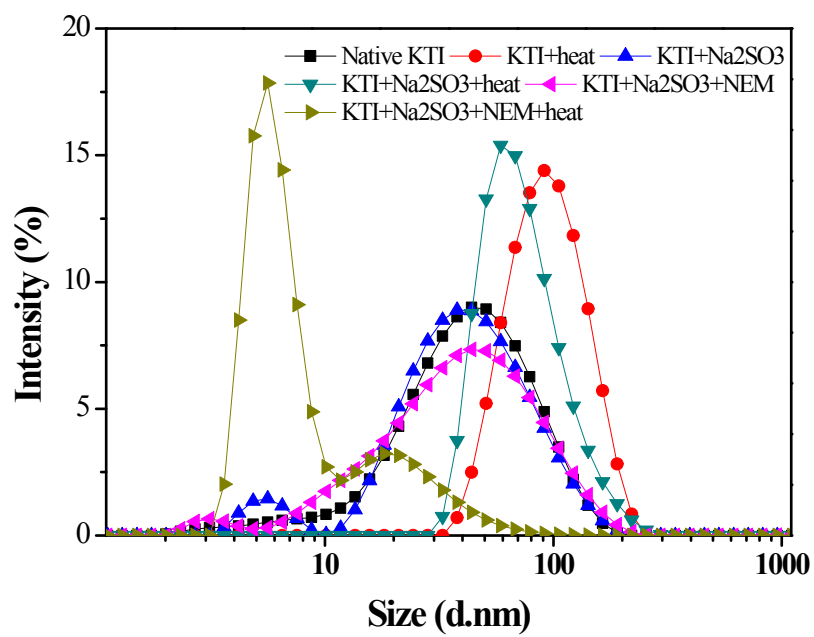

**Figure S2.** Size distribution of KTI with various treatments.

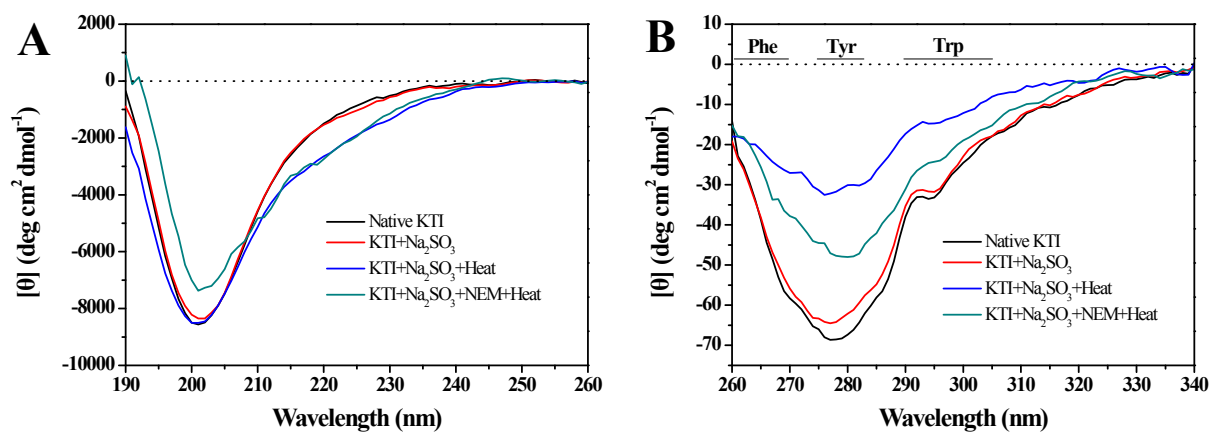

**Figure S3.** Circular dichroism (CD) spectra of KTI with various treatments. (A) Far-UV CD spectra, (B) Near-UV CD spectra.

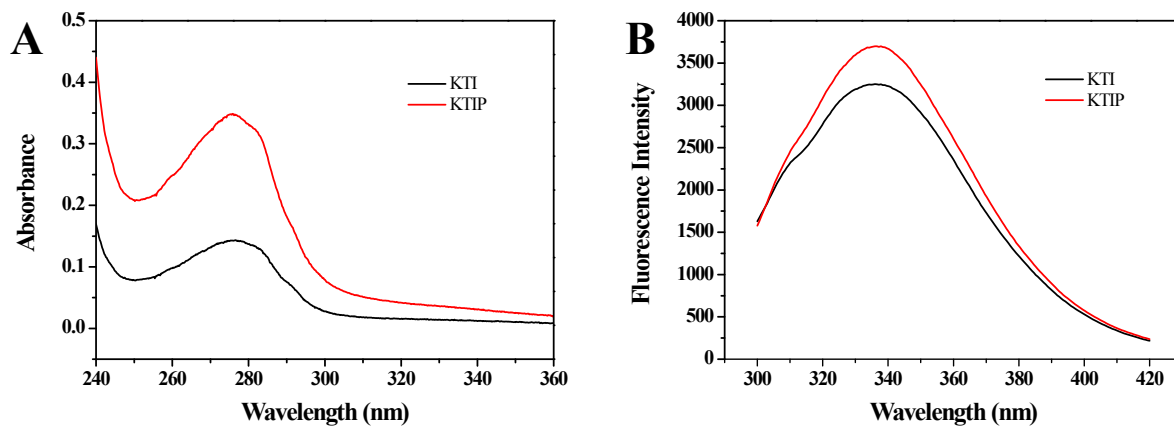

**Figure S4.** UV-Vis spectrum (A) and intrinsic fluorescence (B) of KTIP relative to KTI.

**Table S1** IC<sub>50</sub> values of native curcumin and nanoparticulate curcumin in different tumor cells as assayed by MTT cytotoxicity assay.

| Tumor cells | Native curcumin IC <sub>50</sub> values ( $\mu$ M) | Nanoparticulate curcumin IC <sub>50</sub> values ( $\mu$ M) |
|-------------|----------------------------------------------------|-------------------------------------------------------------|
| A549        | 28.1                                               | 19.0                                                        |
| D145        | 27.0                                               | 16.5                                                        |
| HCT-116     | 25.0                                               | 12.0                                                        |
| HepG2       | 27.5                                               | 17.0                                                        |
| K562        | 26.9                                               | 12.9                                                        |
| MCF-7       | 28.7                                               | 12.3                                                        |
